# Supplementary material for: Simple one-pot synthesis of Cu4SnS4 nanoplates and temperature-induced phase transformation mechanism
Source: Royal Society of Chemistry journal article supplement (doi:10.1039/c9ce01772k), 2020-01-01
Supplement: c9ce01772k1.pdf [file c9ce01772k1.pdf]

## Supporting Information

# Simple One-pot Synthesis of Two-Dimensional (2D) $\text{Cu}_4\text{SnS}_4$ Nanoplates and Temperature-Induced Phase Transformation Mechanism

Xiaoyan Zhang<sup>a</sup>, Yu Tang<sup>a</sup>, Yifeng Wang<sup>c</sup>, Liming Shen<sup>a</sup>, Arunava Gupta<sup>b</sup>, Ningzhong Bao<sup>a,d\*</sup>

<sup>a</sup> State Key Laboratory of Material-Oriented Chemical Engineering, College of Chemical Engineering, Nanjing Tech University, Nanjing, Jiangsu 210009, P. R. China

<sup>b</sup> Centre for Materials for Information Technology, The University of Alabama, Tuscaloosa, AL 35487, USA

<sup>c</sup> College of Materials Science and Engineering, Nanjing Tech University, Nanjing, Jiangsu 210009, China

<sup>d</sup> Jiangnan Graphene Research Institute, Changzhou, Jiangsu 213159, P. R. China

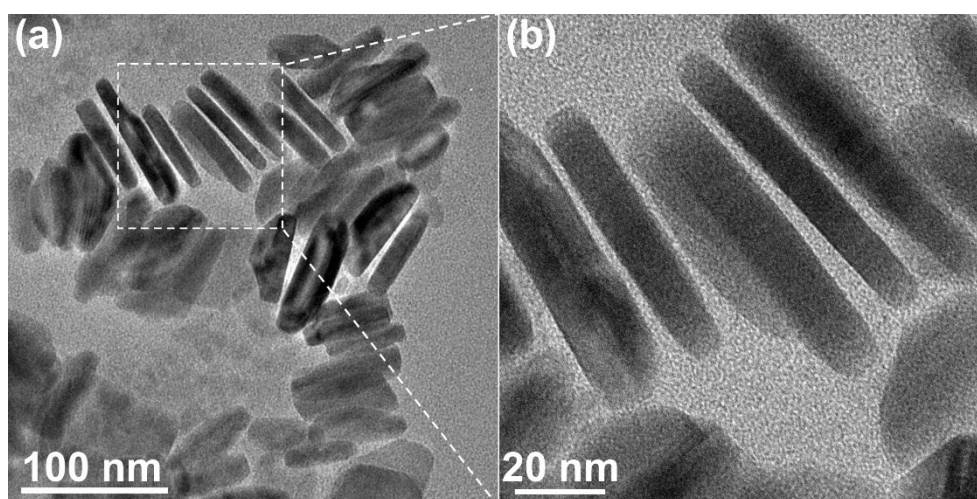

**Fig. S1** TEM images of the  $\text{Cu}_4\text{SnS}_4$  nanoplates

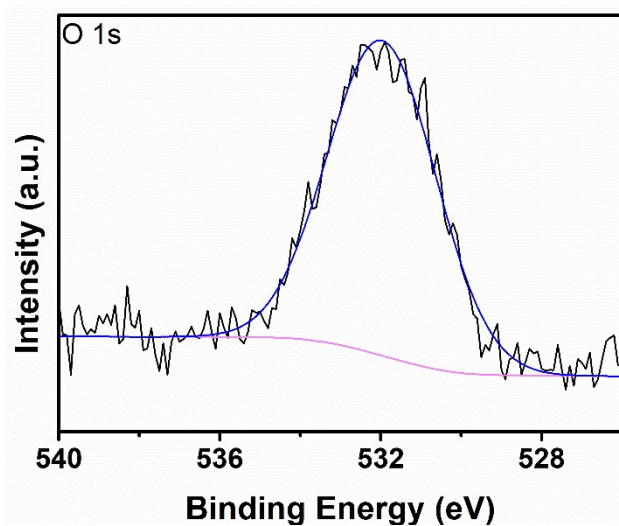

Fig. S2 High-resolution XPS spectra of O for  $\text{Cu}_4\text{SnS}_4$  nanoplates.

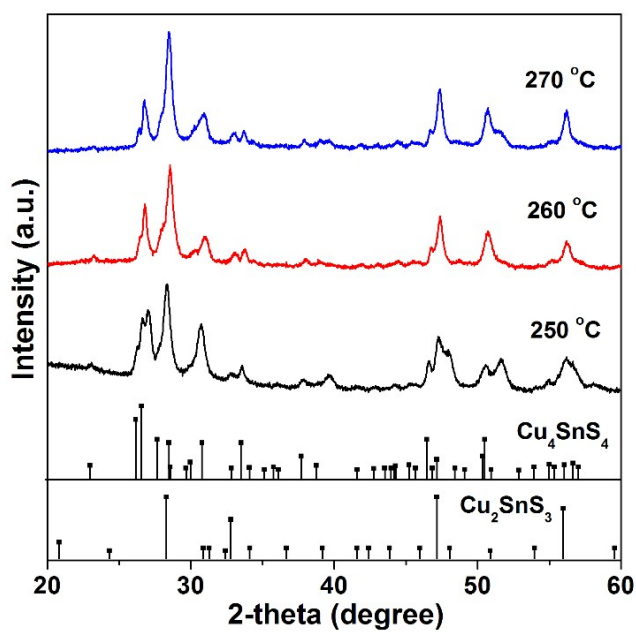

Fig. S3 XRD patterns of  $\text{Cu-Sn-S}$  synthesized at different reaction temperatures by direct heat-up process.
